# Supplementary material
Source: HighWire-hosted journal article supplement (https://bmjopen.bmj.com/content/14/7/e080791)
Supplement: inline-supplementary-material-1 [file inline-supplementary-material-1.pdf]

Content validity format

**Title of the tools validated:** Assessing healthcare workers’ confidence levels in diagnosis and management of emerging infectious virus of human monkeypox at Amhara Region.

Dear experts!!

We beseech your expert opinion and on the degree of relevance of each item being measured. This instrument will be used to our study entitled “Assessing healthcare workers’ confidence levels in diagnosis and management of emerging infectious virus of human monkeypox at Amhara Region”.

This instrument are provided below to guide you in your analysis. Please use the following rating scales and rate each item as objective as possible in your view.

- Degree of relevance
- 1= the item is not relevant for measured outcome.
- 2= the item is somewhat relevant for measured outcome
- 3= the item is relevant for measured outcome
- 4= the item is highly relevant for measured outcome

|      |                                                 |                  |                       |              |                     |
|------|-------------------------------------------------|------------------|-----------------------|--------------|---------------------|
| C    |                                                 |                  |                       |              |                     |
| S.No | Questionaries                                   | Not relevant (1) | Somewhat relevant (2) | Relevant (3) | Highly relevant (4) |
|      | Diagnosis related questions of mpox             |                  |                       |              |                     |
| 1    | Does Monkeypox is spread from animals to humans |                  |                       |              |                     |
| 2    | Does Monkeypox is caused by a virus             |                  |                       |              |                     |
| 3    | Does Monkeypox is spread from human to humans   |                  |                       |              |                     |
| 4    | Does Monkeypox is spread from humans to animals |                  |                       |              |                     |

|    |                                                                                                                                                                                                |  |  |  |  |
|----|------------------------------------------------------------------------------------------------------------------------------------------------------------------------------------------------|--|--|--|--|
| 5  | Monkeypox occurs in primarily in tropical rainforest areas of Africa and is occasionally exported to other region                                                                              |  |  |  |  |
| 6  | Does monkeypox spreads from person-to-person by skin-to-skin (such as touching or vaginal/anal sex)                                                                                            |  |  |  |  |
| 7  | Does monkeypox spreads from person-to-person by Close contact or face-to-face (such as talking, breathing or singing close to one another which can generate droplets or short-range aerosols) |  |  |  |  |
| 8  | Does monkeypox spreads from person-to-person by mouth-to-skin contact (such as oral sex or kissing the skin)                                                                                   |  |  |  |  |
| 9  | Reporting symptoms of Monkeypox to local health authorities is important to prevent further disease transmission                                                                               |  |  |  |  |
| 10 | Avoiding contact with wild animals (alive or dead) essential to prevent further monkeypox transmission                                                                                         |  |  |  |  |
| 11 | Fever is the common signs or symptoms of human monkeypox                                                                                                                                       |  |  |  |  |
| 12 | Does monkeypox spreads by contaminated environment from person-to-person with the monkeypox virus:                                                                                             |  |  |  |  |
| 13 | Monkeypox is a bacterial disease infection                                                                                                                                                     |  |  |  |  |
| 14 | Monkeypox and smallpox have similar signs and symptoms                                                                                                                                         |  |  |  |  |
| 15 | The interval from infection to onset of symptoms is usually from 6 to 13 days but can range from 5 to 21 days                                                                                  |  |  |  |  |

|    |                                                                                                                                                      |  |  |  |  |
|----|------------------------------------------------------------------------------------------------------------------------------------------------------|--|--|--|--|
| 16 | headache is one of the signs or symptoms of human monkeypox                                                                                          |  |  |  |  |
| 17 | muscle aches is one of the signs or symptoms of human monkeypox                                                                                      |  |  |  |  |
| 18 | back pain and lower energy is one of the signs or symptoms of human monkeypox                                                                        |  |  |  |  |
| 19 | swollen lymph nodes is one of the signs or symptoms of human monkeypox                                                                               |  |  |  |  |
| 20 | rash of face, palms of the hands, soles of the feet, groin, genital and/or anal regions is one of the signs or symptoms of human monkeypox           |  |  |  |  |
| 21 | Does monkeypox spreads from person-to-person by mouth-to-mouth (such as kissing)                                                                     |  |  |  |  |
| 22 | Does monkeypox spreads from person-to-person by the virus can also spread during pregnancy to the fetus, during or after birth                       |  |  |  |  |
| 23 | Frequent hands washing for at least 20 s with soap and water or alcohol based hand sanitizers is essential to prevent further monkeypox transmission |  |  |  |  |
| 24 | Pustules on the skin are one of the signs or symptoms of human Monkeypox                                                                             |  |  |  |  |
| 25 | Avoiding contact with any objectives that have been in contact with sick animal can prevent spread of disease                                        |  |  |  |  |
| 26 | Avoiding contact with any person that has a rash can prevent spread of disease                                                                       |  |  |  |  |

|    |                                                                                                             |  |  |  |  |
|----|-------------------------------------------------------------------------------------------------------------|--|--|--|--|
| 27 | Avoiding contact with any objective that has been in contact with sick person can prevent spread of disease |  |  |  |  |
| 28 | Monkeypox usually a self-limited disease with the symptoms lasting from 2 to 4 weeks                        |  |  |  |  |
|    | <b>Management related questions of mpox</b>                                                                 |  |  |  |  |
| 1  | Monkeypox can be treated with the available antiviral medications                                           |  |  |  |  |
| 2  | Antibiotics are effective in monkeypox treatment                                                            |  |  |  |  |
| 3  | Vaccination is available to prevent human monkeypox                                                         |  |  |  |  |
| 4  | Symptomatic supportive care is to be considered in the management of Monkeypox disease                      |  |  |  |  |
| 5  | One management option for monkeypox patients who are symptomatic is to use paracetamol                      |  |  |  |  |
| 6  | Antibiotics are used to treat human monkeypox                                                               |  |  |  |  |
| 7  | There is no treatment for monkeypox until now                                                               |  |  |  |  |
|    | <b>Preparedness related questions of mpox</b>                                                               |  |  |  |  |
| 1  | Diagnose monkeypox virus based on your current status?                                                      |  |  |  |  |
| 2  | Diagnoses monkeypox virus based your current facility diagnostic test?                                      |  |  |  |  |
| 3  | Do you manage monkey poxvirus cases, in this situation?                                                     |  |  |  |  |

|   |                                                                                                                                                                                |  |  |  |  |
|---|--------------------------------------------------------------------------------------------------------------------------------------------------------------------------------|--|--|--|--|
| 4 | Does rapid response team (RRT) ready to manage unusual events like monkeypox virus cases, in this situation?                                                                   |  |  |  |  |
| 5 | Do you participate rapid response team (RRT) activities to manage unusual events like monkeypox virus?                                                                         |  |  |  |  |
| 6 | Do you face public health threatening events like COVID-19 in the previous working time that helps to cope the current and future emerging events like manage monkeypox virus? |  |  |  |  |
| 7 | is there any strong triage room in your health facility to diagnose unusual events                                                                                             |  |  |  |  |
| 8 | Is there enough medical equipment to manage monkeypox cases?                                                                                                                   |  |  |  |  |
| 9 | Do you manage monkeypox cases, based on your facility medication commodities                                                                                                   |  |  |  |  |
|   | <b>Attitude related questions of mpox</b>                                                                                                                                      |  |  |  |  |
| 1 | Monkeypox spread worldwide due to the role of male homosexuals                                                                                                                 |  |  |  |  |
| 2 | I am skeptical about the official explanation regarding the cause of virus emergence                                                                                           |  |  |  |  |
| 3 | I do not trust the information about the viruses from scientific experts                                                                                                       |  |  |  |  |
| 4 | I do not trust the information about the viruses from scientific experts                                                                                                       |  |  |  |  |
| 5 | The spread of viruses is a deliberate attempt to reduce the size of the global population                                                                                      |  |  |  |  |

|    |                                                                                                                                  |  |  |  |  |
|----|----------------------------------------------------------------------------------------------------------------------------------|--|--|--|--|
| 6  | The spread of viruses is a deliberate attempt by governments to gain political control                                           |  |  |  |  |
| 7  | The spread of viruses is a deliberate attempt by global companies to take control                                                |  |  |  |  |
| 8  | Lockdowns in response to emerging infection are aimed for mass surveillance and to control every aspect of our lives             |  |  |  |  |
| 9  | Lockdowns in response to emerging infection are aimed for mass surveillance and to destabilize the economy for financial gain    |  |  |  |  |
| 10 | Lockdown is a way to terrify, isolate, and demoralize a society as a whole in order to reshape society to fit specific interests |  |  |  |  |
| 11 | Viruses are biological weapons manufactured by the superpowers to take global control                                            |  |  |  |  |
| 12 | The mainstream media is deliberately feeding us misinformation about the virus and lockdown                                      |  |  |  |  |
| 13 | Monkeypox was a plot by globalists to destroy religion by banning gatherings                                                     |  |  |  |  |

Name and signature of experts----- date-----
