# Supplementary material
Source: HighWire-hosted journal article supplement (https://bmjopen.bmj.com/content/14/7/e080791)
Supplement: inline-supplementary-material-2 [file inline-supplementary-material-2.pdf]

| No            | Questionnaires                                                                                                                                                                                 | Exp1 | Exp2 | Exp3 | Exp4 | Exp5 | Exp6 | Number of agreements | Item content validity ratio (I-CVR) | UA |
|---------------|------------------------------------------------------------------------------------------------------------------------------------------------------------------------------------------------|------|------|------|------|------|------|----------------------|-------------------------------------|----|
| <b>Part-1</b> | <b>Diagnosis related questions</b>                                                                                                                                                             |      |      |      |      |      |      |                      |                                     |    |
| 1             | Does Monkeypox is spread from animals to humans                                                                                                                                                | 4    | 3    | 3    | 3    | 4    | 4    | 6                    | 1                                   | 6  |
| 2             | Does Monkeypox is caused by a virus                                                                                                                                                            | 4    | 4    | 4    | 4    | 4    | 4    | 6                    | 1                                   | 6  |
| 3             | Does Monkeypox is spread from human to humans                                                                                                                                                  | 4    | 4    | 3    | 3    | 4    | 4    | 6                    | 1                                   | 6  |
| 4             | Does Monkeypox is spread from humans to animals                                                                                                                                                | 4    | 3    | 2    | 4    | 4    | 4    | 5                    | 0.8333333                           | 5  |
| 5             | Monkeypox occurs in primarily in tropical rainforest areas of Africa and is occasionally exported to another region                                                                            | 2    | 4    | 4    | 4    | 3    | 4    | 5                    | 0.8333333                           | 5  |
| 6             | Does monkeypox spreads from person-to-person by skin-to-skin (such as touching or vaginal/anal sex)                                                                                            | 4    | 4    | 4    | 3    | 4    | 4    | 6                    | 1                                   | 6  |
| 7             | Does monkeypox spreads from person-to-person by Close contact or face-to-face (such as talking, breathing or singing close to one another which can generate droplets or short-range aerosols) | 3    | 4    | 3    | 4    | 4    | 4    | 6                    | 1                                   | 6  |
| 8             | Does monkeypox spreads from person-to-person by mouth-to-skin contact (such as oral sex or kissing the skin)                                                                                   | 4    | 4    | 3    | 3    | 4    | 4    | 6                    | 1                                   | 6  |

|    |                                                                                                                  |   |   |   |   |   |   |   |           |   |
|----|------------------------------------------------------------------------------------------------------------------|---|---|---|---|---|---|---|-----------|---|
| 9  | Reporting symptoms of Monkeypox to local health authorities is important to prevent further disease transmission | 4 | 4 | 2 | 4 | 4 | 4 | 5 | 0.8333333 | 5 |
| 10 | Avoiding contact with wild animals (alive or dead) essential to prevent further monkeypox transmission           | 4 | 2 | 4 | 4 | 4 | 4 | 5 | 0.8333333 | 5 |
| 11 | Fever is the common signs or symptoms of human monkeypox                                                         | 4 | 4 | 4 | 4 | 4 | 4 | 6 | 1         | 6 |
| 12 | Does monkeypox spreads by contaminated environment from person-to-person with the monkeypox virus:               | 4 | 3 | 4 | 4 | 4 | 4 | 6 | 1         | 6 |
| 13 | Monkeypox is a bacterial disease infection                                                                       | 4 | 2 | 4 | 4 | 4 | 3 | 5 | 0.8333333 | 5 |
| 14 | Monkeypox and smallpox have similar signs and symptoms                                                           | 4 | 4 | 4 | 4 | 4 | 4 | 6 | 1         | 6 |
| 15 | The interval from infection to onset of symptoms is usually from 6 to 13 days but can range from 5 to 21 days    | 4 | 3 | 3 | 2 | 4 | 4 | 5 | 0.8333333 | 5 |
| 16 | headache is one of the signs or symptoms of human monkeypox                                                      | 4 | 4 | 4 | 4 | 3 | 4 | 6 | 1         | 6 |
| 17 | muscle aches is one of the signs or symptoms of human monkeypox                                                  | 4 | 4 | 4 | 4 | 4 | 4 | 6 | 1         | 6 |
| 18 | back pain and lower energy is one of the signs or symptoms of human monkeypox                                    | 4 | 4 | 3 | 4 | 4 | 4 | 6 | 1         | 6 |
| 19 | swollen lymph nodes is one of the signs or symptoms of human monkeypox                                           | 4 | 4 | 4 | 4 | 4 | 4 | 6 | 1         | 6 |

|    |                                                                                                                                                      |   |   |   |   |   |   |   |           |   |
|----|------------------------------------------------------------------------------------------------------------------------------------------------------|---|---|---|---|---|---|---|-----------|---|
| 20 | rash of face, palms of the hands, soles of the feet, groin, genital and/or anal regions is one of the signs or symptoms of human monkeypox           | 4 | 4 | 2 | 4 | 4 | 4 | 5 | 0.8333333 | 5 |
| 21 | Does monkeypox spreads from person-to-person by mouth-to-mouth (such as kissing)                                                                     | 4 | 4 | 4 | 4 | 4 | 4 | 6 | 1         | 6 |
| 22 | Does monkeypox spreads from person-to-person by the virus can also spread during pregnancy to the fetus, during or after birth                       | 4 | 4 | 4 | 4 | 4 | 3 | 6 | 1         | 6 |
| 23 | Frequent hands washing for at least 20 s with soap and water or alcohol-based hand sanitizers is essential to prevent further monkeypox transmission | 4 | 4 | 4 | 4 | 4 | 4 | 6 | 1         | 6 |
| 24 | Pustules on the skin are one of the signs or symptoms of human Monkeypox                                                                             | 4 | 2 | 4 | 4 | 3 | 4 | 5 | 0.8333333 | 5 |
| 25 | Avoiding contact with any objectives that have been in contact with sick animal can prevent spread of disease                                        | 4 | 4 | 4 | 4 | 4 | 4 | 6 | 1         | 6 |
| 26 | Avoiding contact with any person that has a rash can prevent spread of disease                                                                       | 4 | 4 | 3 | 4 | 4 | 4 | 6 | 1         | 6 |
| 27 | Avoiding contact with any objective that has been in contact with sick person can prevent spread of disease                                          | 4 | 4 | 4 | 4 | 3 | 4 | 6 | 1         | 6 |

|        |                                                                                        |   |   |   |   |   |   |   |           |   |
|--------|----------------------------------------------------------------------------------------|---|---|---|---|---|---|---|-----------|---|
| 28     | Monkeypox usually a self-limited disease with the symptoms lasting from 2 to 4 weeks   | 4 | 4 | 4 | 4 | 4 | 4 | 6 | 1         | 6 |
| Part-2 | <b>Management related question</b>                                                     |   |   |   |   |   |   |   |           |   |
| 1      | Monkeypox can be treated with the available antiviral medications                      | 4 | 4 | 4 | 4 | 4 | 4 | 6 | 1         | 6 |
| 2      | Antibiotics are effective in monkeypox treatment                                       | 4 | 4 | 4 | 4 | 4 | 4 | 6 | 1         | 6 |
| 3      | Vaccination is available to prevent human monkeypox                                    | 4 | 4 | 4 | 4 | 4 | 4 | 6 | 1         | 6 |
| 4      | Symptomatic supportive care is to be considered in the management of Monkeypox disease | 4 | 4 | 4 | 4 | 3 | 4 | 6 | 1         | 6 |
| 5      | One management option for monkeypox patients who are symptomatic is to use paracetamol | 4 | 4 | 4 | 4 | 4 | 4 | 6 | 1         | 6 |
| 6      | Antibiotics are used to treat human monkeypox                                          | 4 | 4 | 4 | 3 | 4 | 3 | 6 | 1         | 6 |
| 7      | There is no treatment for monkeypox until now                                          | 4 | 4 | 4 | 4 | 4 | 4 | 6 | 1         | 6 |
| Part-3 | <b>Preparedness related question</b>                                                   |   |   |   |   |   |   |   |           |   |
| 1      | Diagnose monkeypox virus based on your current status?                                 | 4 | 4 | 4 | 4 | 3 | 4 | 6 | 1         | 6 |
| 2      | Diagnoses monkeypox virus based your current facility diagnostic test?                 | 4 | 4 | 4 | 4 | 2 | 4 | 5 | 0.8333333 | 5 |
| 3      | Do you manage monkey poxvirus cases, in this situation?                                | 4 | 4 | 4 | 4 | 4 | 4 | 6 | 1         | 6 |

|               |                                                                                                                                                                                |   |   |   |   |   |   |   |           |   |
|---------------|--------------------------------------------------------------------------------------------------------------------------------------------------------------------------------|---|---|---|---|---|---|---|-----------|---|
| 4             | Does rapid response team (RRT) ready to manage unusual events like monkeypox virus cases, in this situation?                                                                   | 4 | 4 | 4 | 4 | 2 | 4 | 5 | 0.8333333 | 5 |
| 5             | Do you participate rapid response team (RRT) activities to manage unusual events like monkeypox virus?                                                                         | 4 | 4 | 4 | 4 | 4 | 4 | 6 | 1         | 6 |
| 6             | Do you face public health threatening events like COVID-19 in the previous working time that helps to cope the current and future emerging events like manage monkeypox virus? | 4 | 4 | 4 | 4 | 4 | 4 | 6 | 1         | 6 |
| 7             | is there any strong triage room in your health facility to diagnose unusual events                                                                                             | 4 | 4 | 4 | 4 | 4 | 3 | 6 | 1         | 6 |
| 8             | Is there enough medical equipment to manage monkeypox cases?                                                                                                                   | 4 | 4 | 4 | 4 | 3 | 4 | 6 | 1         | 6 |
| 9             | Do you manage monkeypox cases, based on your facility medication commodities                                                                                                   | 4 | 4 | 4 | 4 | 4 | 4 | 6 | 1         | 6 |
| <b>Part-4</b> | <b>Attitude related questions</b>                                                                                                                                              |   |   |   |   |   |   |   |           |   |
| 1             | Monkeypox spread worldwide due to the role of male homosexuals                                                                                                                 | 4 | 4 | 4 | 4 | 4 | 4 | 6 | 1         | 6 |
| 2             | I am skeptical about the official explanation regarding the cause of virus emergence                                                                                           | 4 | 4 | 4 | 4 | 2 | 4 | 5 | 0.8333333 | 5 |

|    |                                                                                                                                  |   |   |   |   |   |   |   |           |   |
|----|----------------------------------------------------------------------------------------------------------------------------------|---|---|---|---|---|---|---|-----------|---|
| 3  | I do not trust the information about the viruses from scientific experts                                                         | 4 | 4 | 4 | 4 | 4 | 4 | 6 | 1         | 6 |
| 4  | I do not trust the information about the viruses from scientific experts                                                         | 4 | 4 | 4 | 4 | 4 | 3 | 6 | 1         | 6 |
| 5  | The spread of viruses is a deliberate attempt to reduce the size of the global population                                        | 4 | 4 | 4 | 4 | 3 | 4 | 6 | 1         | 6 |
| 6  | The spread of viruses is a deliberate attempt by governments to gain political control                                           | 4 | 4 | 4 | 4 | 4 | 4 | 6 | 1         | 6 |
| 7  | The spread of viruses is a deliberate attempt by global companies to take control                                                | 4 | 4 | 4 | 4 | 4 | 4 | 6 | 1         | 6 |
| 8  | Lockdowns in response to emerging infection are aimed for mass surveillance and to control every aspect of our lives             | 4 | 4 | 4 | 2 | 4 | 4 | 5 | 0.8333333 | 5 |
| 9  | Lockdowns in response to emerging infection are aimed for mass surveillance and to destabilize the economy for financial gain    | 4 | 4 | 3 | 4 | 4 | 4 | 6 | 1         | 6 |
| 10 | Lockdown is a way to terrify, isolate, and demoralize a society as a whole in order to reshape society to fit specific interests | 4 | 3 | 2 | 4 | 4 | 4 | 5 | 0.8333333 | 5 |
| 11 | Viruses are biological weapons manufactured by the superpowers to take global control                                            | 4 | 4 | 4 | 4 | 4 | 3 | 6 | 1         | 6 |
| 12 | The mainstream media is deliberately feeding us misinformation about                                                             |   |   |   | 4 | 4 | 4 | 6 | 1         | 6 |

|    |                                                                              |            |            |            |            |            |            |            |                   |            |
|----|------------------------------------------------------------------------------|------------|------------|------------|------------|------------|------------|------------|-------------------|------------|
|    | the virus and lockdown                                                       | 4          | 4          | 4          |            |            |            |            |                   |            |
| 13 | Monkeypox was a plot by globalists to destroy religion by banning gatherings | 4          | 4          | 4          | 4          | 3          | 4          | 6          | 1                 | 6          |
|    | <b>Total</b>                                                                 | <b>225</b> | <b>217</b> | <b>212</b> | <b>219</b> | <b>213</b> | <b>222</b> | <b>329</b> | <b>54.8333333</b> | <b>329</b> |
|    | <b>Proportion of relevance</b>                                               | 0.99       | 1          | 0.9        | 1          | 0.93       | 1          | 0.962      | 0.96199           |            |
|    | <b>Average proportion of items judged as relevance across the 6 experts</b>  |            |            |            |            |            |            |            | 0.9561            |            |

### Calculated content validity ratio part by part

| <b>Diagnosis related Questions</b>               | <b>Score</b> |  | <b>Management related Questions</b>              | <b>Score</b> |
|--------------------------------------------------|--------------|--|--------------------------------------------------|--------------|
| SUM of (I-CVI)                                   | 26.66666667  |  | SUM of (I-CVI)                                   | 7            |
| S-CVI Average (sum of I-CVI/No of questions)     | 0.952380952  |  | S-CVI Average (sum of I-CVI/No of questions)     | 1            |
| Total universal agreement                        | 160          |  | Total universal agreement                        | 42           |
| UA = Total agreement/ No. Items                  | 0.952380952  |  | UA = Total agreement/ No. Items                  | 1            |
| S-CVI Relevance (sum of UA/ Number of questions) | 0.952380952  |  | S-CVI Relevance (sum of UA/ Number of questions) | 1            |

| <b>For Knowledge</b>                         | <b>Score</b> |  | <b>Preparedness related Questions</b>        | <b>Score</b> |
|----------------------------------------------|--------------|--|----------------------------------------------|--------------|
| SUM of (I-CVI)                               | 33.66667     |  | SUM of (I-CVI)                               | 8.6667       |
| S-CVI Average (sum of I-CVI/No of questions) | 0.961905     |  | S-CVI Average (sum of I-CVI/No of questions) | 0.963        |
| Total universal agreement                    | 202          |  | Total universal agreement                    | 52           |

|                                                     |          |  |                                                     |       |
|-----------------------------------------------------|----------|--|-----------------------------------------------------|-------|
| UA = Total agreement/ No. Items                     | 0.961905 |  | UA = Total agreement/ No. Items                     | 0.963 |
| S-CVI Relevance (sum of UA/<br>Number of questions) | 0.961905 |  | S-CVI Relevance (sum of UA/<br>Number of questions) | 0.963 |

| For Confidence level                                | Score       |  | Attitude related Questions                          | Score    |
|-----------------------------------------------------|-------------|--|-----------------------------------------------------|----------|
| SUM of (I-CVI)                                      | 42.33333333 |  | SUM of (I-CVI)                                      | 11.5     |
| S-CVI Average (sum of I-CVI/<br>No of questions)    | 0.962121212 |  | S-CVI Average (sum of I-CVI/<br>No of questions)    | 0.884615 |
| Total universal agreement                           | 254         |  | Total universal agreement                           | 69       |
| UA = Total agreement/ No. Items                     | 0.962121212 |  | UA = Total agreement/ No. Items                     | 0.884615 |
| S-CVI Relevance (sum of UA/<br>Number of questions) | 0.962121212 |  | S-CVI Relevance (sum of UA/<br>Number of questions) | 0.884615 |

| The overall the questionnaire CVR                         |             |
|-----------------------------------------------------------|-------------|
| SUM of (I-CVI)                                            | 54.83333333 |
| S-CVI Average (sum of I-CVI/<br>No of questions)          | 0.961988304 |
| Total universal agreement                                 | 329         |
| UA = Total agreement/ No. Items                           | 0.961988304 |
| S-CVI Relevance (sum of UA/<br>Number of questions)       | 0.961988304 |
| <b>Legends:</b>                                           |             |
| CVI = content validity index                              |             |
| I-CVI = Item- content validity index                      |             |
| S-CVI = Scale - content validity index                    |             |
| UA = universal agreement                                  |             |
| UA = Total agreement/ No. Items                           |             |
| I-CV = Number of agreement (per item) / Number of experts |             |
| S-CVI = I-CVI/Number of items                             |             |
| recorded for at least six= 0.8333                         |             |
